# Supplementary material for: Characterisation of ‘bog butter’ using a combination of molecular and isotopic techniques
Source: Royal Society of Chemistry journal article supplement (doi:10.1039/b313436a), 2004-01-01
Supplement: b313436a.doc [file b313436a.doc]

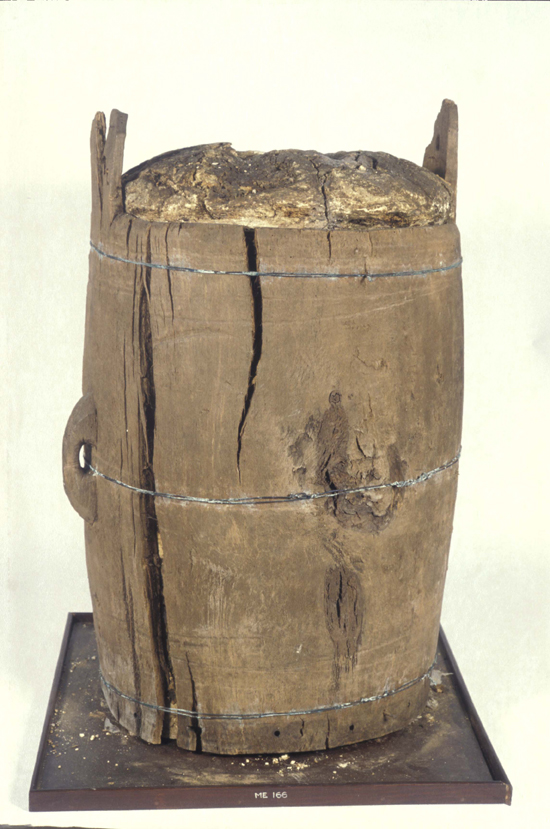


Image of bog butter barrel, *ca*. 1.4 m high, found at Glen Gell, Morven (object number ME166). Image copyright of Trustees of the National Museums of Scotland.
